# Supplementary material
Source: publisher site journal article supplement (https://www.dovepress.com/article/301510)
Supplement: Supplementary file 1 [file get_supplementary_file.php]

**SUPPLEMENTARY MATERIAL FOR CLUSTERING OF HIV PATIENTS IN ETHIOPIA**

Wondimu Biressaw, 1 Habtamu Tilaye, 2 Dessie Melese2

1Benishangul-Gumuz, Wombera Sineor Secondary and Preparatory School, Benishangul, Ethiopia 2University of Gondar, College of Natural and Computational Science, Department of Statistics, Gondar, Ethiopia

Corresponding author: Dessie Melese University of Gondar, College of Natural and Computational Science, Department of Statistics, Gondar, Ethiopia Email: dessie.melese1@uog.edu.et/dessiecsa@gmail.com P.O. Box 196

Table S1: **Variable in each cluster**

| Clusters | Agglomerative | K-mean | Bootstrap |
| --- | --- | --- | --- |
| Cluster 1 | HV104Sex of household members, Hv201A Water not available for at least a day last two weeks, Hv241 Food cooked in the house/separate building/ outdoors, Hv235 Location of source for water, Hv237 Anything done to water to make safe for drink, Hv230A Place where household members wash their hands, Hv115 Current marital status | Hv201A Water not available for at least a day last two weeks, Hv241 Food cooked in the house/separate building/ outdoors, Hv235 Location of source for water, Hv237 Anything done to water to make safe for drink, Hv230A Place where household members wash their hands, Hv115 Current marital status | HV104Sex of household  Hv201A Water not available for at least a day last two weeks, Hv241 Food cooked in the house/separate building/ outdoors, Hv235 Location of source for water, Hv237 Anything done to water to make safe for drink, Hv230A Place where household members wash their hands, Hv115 Current marital status |
| Cluster 2 | SH121G; Hv206 Has electricity, Hv270 Wealth index combined, Hv024 Region, Hv106 Highest education level attained, Hv243A Has mobile telephone, Sh121G Table, | Hv206 Has electricity, Hv270 Wealth index combined, Hv024 Region, Hv106 Highest education level attained, Hv243A Has mobile telephone, Sh121G Table, Hv207 Has radio | Hv206 Has electricity, Hv270 Wealth index combined, Hv024 Region, Hv106 Highest education level attained, Hv243A Has mobile telephone, Sh121G Table, |
| Cluster 3 | Hv246 Owns livestock ,herds or farm animals, Hv025 Type of place of residence | Hv246 Owns livestock ,herds or farm animals, Hv025 Type of place of residence | Hv246 Owns livestock ,herds or farm animals, Hv025 Type of place of residence |
